# Supplementary material
Source: Springer Nature journal article supplement (https://www.springermedizin.de/resource/supplementary/13633_2011_7_MOESM2_ESM.pdf/9595472)

**A**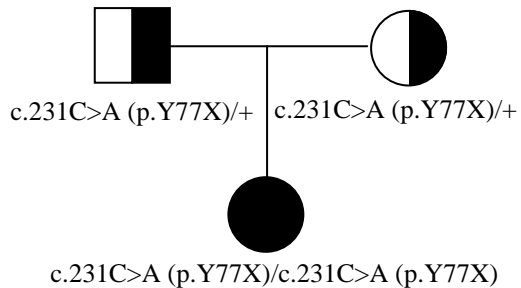**B**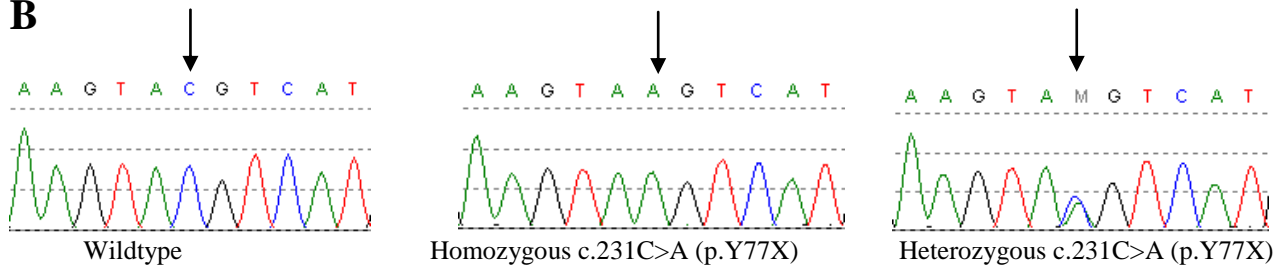

Supplement: MOESM2 [file 9595472]
